# Supplementary material for: Chemistry with spatial control using particles and streams
Source: Royal Society of Chemistry journal article supplement (doi:10.1039/c2ra20337e), 2012-01-01
Supplement: c2ra20337e.pdf [file c2ra20337e.pdf]

## Supplementary Information for: Chemistry with spatial control using particles and streams

Yevgeniy V. Kalinin<sup>1</sup>, Adithya Murali<sup>1</sup> and David H. Gracias\*<sup>1,2</sup>

<sup>1</sup> Department of Chemical and Biomolecular Engineering, <sup>2</sup> Department of Chemistry,  
Johns Hopkins University, Baltimore, MD 21218, USA.

\*Corresponding author: Prof. D. H. Gracias ([dgracias@jhu.edu](mailto:dgracias@jhu.edu))

**Table S1. List of abbreviations and acronyms used in the paper (alphabetical order).**

| Abbreviation | Full Form                                               | Section |
|--------------|---------------------------------------------------------|---------|
| AHL          | Acyl-homoserine lactone                                 | 1.2     |
| Bcd          | Bicoid                                                  | 1.2     |
| BMP-2        | Bone morphogenic protein-2                              | 1.3     |
| BSA          | Bovine serum albumin                                    | 3.2     |
| BZ           | Belousov-Zhabotinsky                                    | 1.3     |
| c-AMP        | Cyclic Adenosine Monophosphate                          | 1.2     |
| CalB         | Candida antarctica lipase B                             | 3.1     |
| CLSM         | Confocal laser scanning microscopy                      | 3.2     |
| CNS          | Central Nervous System                                  | 1.2     |
| DDAO         | Dichlorodimethylacridinone                              | 4.1     |
| Dex-HEMA     | Dextran-hydroxy-ethyl-methacrylate                      | 4.1     |
| DMAEMA       | Dimethylaminoethyl Methacrylate                         | 4.1     |
| DRGs         | Dorsal root ganglion cells                              | 3.5     |
| Eps          | Extracellular polymeric substance                       | 1.1     |
| FDP          | Fluorescein diphosphate                                 | 4.1     |
| FITC-BSA     | Fluorescein isothiocyanate labeled bovine serum albumin | 3.2     |
| FtsZ         | Filamenting temperature-sensitive mutant Z              | 1.1     |
| GFP          | Green Fluorescent Protein                               | 1.2     |

|                 |                                                   |     |
|-----------------|---------------------------------------------------|-----|
| GOD             | Glucose oxidase                                   | 5   |
| GO <sub>x</sub> | Glucose oxidase                                   | 3.1 |
| GRGDS           | Glycine–arginine–glycine–<br>aspartic acid–serine | 3.5 |
| Hb              | Hemoglobin                                        | 1.2 |
| HRP             | Horseradish peroxidase                            | 3.1 |
| IR-light        | Infrared light                                    | 4.1 |
| LCST            | Low critical solution<br>temperature              | 4.1 |
| LSCM            | Light scanning confocal<br>microscopy             | 3.1 |
| LUV             | Large unilamellar vesicle                         | 4.1 |
| MGP             | Matrix gla protein                                | 1.3 |
| MIP-3 $\alpha$  | Macrophage inflammatory<br>protein-3 $\alpha$ ,   | 3.2 |
| NPCs            | Neural progenitor cells                           | 3.5 |
| PDMS            | Polydimethylsiloxane                              | 5   |
| PEG             | Polyethylene glycol                               | 3.3 |
| PLA             | Polylactic acid                                   | 6.2 |
| PLGA            | Poly(lactic-co-glycolic acid)                     | 3.2 |
| pNIPAAm         | poly(Nisopropylacrylamide)                        | 4.1 |
| POD             | Horseradish peroxidase                            | 5   |
| PRINT           | Particle Replication In<br>Nonwetting Templates   | 3.3 |
| PS              | Polystyrene                                       | 4.1 |
| RBL             | Rat Basophil Leukemia cells                       | 5   |
| RF              | Radio-frequency                                   | 4.1 |
| SpeB            | Streptococcal pyrogenic<br>exotoxin B             | 1.1 |
| SUV             | Small unilamellar vesicles                        | 4.1 |
| TMRE            | Tetram-ethylrhodamine ethyl<br>ester              | 6.1 |
| VEGF            | Vascular Endothelial Growth<br>Factor             | 1.2 |
| VMC             | Vascular mesenchymal cells                        | 1.3 |
